## Corrigendum

### **A novel role for a nodal-related protein; Xnr3 regulates convergent extension movements via the FGF receptor**

Chika Yokota, Matt Kofron, Mike Zuck, Douglas W. Houston, Harry Isaacs, Makoto Asashima, Chris C. Wylie and Janet Heasman  
*Development* **130**, 2199-2212.

On p. 2200, the sequence of Xnr3 morpholino oligo is incorrect. The correct sequence is 5' TCTCTGGGTAGATTTGTGGTG-ACTC 3'.

The authors apologise to readers for this mistake.
